# Supplementary material
Source: MDPI journal article supplement (https://www.mdpi.com/2073-4395/13/6/1564)
Supplement: s1 [file s1]

**Table S1** Dry matter distribution amount and proportion of each organ in wheat maturity

| Year      | Variety           | Treatment | Upper three leaves |          | Other leaves |          | Stem     |          | Grain    |          | Glume + rachis |          | Remaining tillers |
|-----------|-------------------|-----------|--------------------|----------|--------------|----------|----------|----------|----------|----------|----------------|----------|-------------------|
|           |                   |           | DMDA (g)           | DMDP (%) | DMDA (g)     | DMDP (%) | DMDA (g) | DMDP (%) | DMDA (g) | DMDP (%) | DMDA (g)       | DMDP (%) | DMDA (g)          |
| 2020-2021 | Jimai22           | CK        | 0.209a             | 7.8b     | 0.073b       | 2.7b     | 0.868b   | 32.4c    | 1.24c    | 46.2abc  | 0.290bc        | 10.9ab   | 0.113ab           |
|           |                   | DF2       | 0.162c             | 5.5c     | 0.050def     | 1.7e     | 0.887b   | 30.2d    | 1.42b    | 48.2a    | 0.423a         | 14.4a    | 0.082bcd          |
|           |                   | DF3       | 0.194abc           | 5.8c     | 0.061bcd     | 1.8e     | 1.040a   | 30.7cd   | 1.66a    | 49.0a    | 0.428a         | 12.7ab   | 0.096abc          |
|           |                   | DF4       | 0.207ab            | 5.9c     | 0.066bc      | 1.8e     | 1.114a   | 31.5cd   | 1.75a    | 49.4a    | 0.401ab        | 11.4ab   | 0.065bcde         |
|           | Jimai20           | CK        | 0.223a             | 9.0b     | 0.085a       | 3.4a     | 0.924b   | 37.5a    | 1.02d    | 41.3d    | 0.216c         | 8.8b     | 0.102ab           |
|           |                   | DF2       | 0.156c             | 5.4c     | 0.068bc      | 2.3bcd   | 1.040a   | 36.0ab   | 1.24c    | 42.9bcd  | 0.389ab        | 13.4ab   | 0.150a            |
|           |                   | DF3       | 0.166bc            | 5.6c     | 0.071b       | 2.4bc    | 1.049a   | 35.3b    | 1.24c    | 41.9cd   | 0.441a         | 14.8a    | 0.098abc          |
|           |                   | DF4       | 0.188abc           | 6.2c     | 0.073b       | 2.4bc    | 1.102a   | 36.0ab   | 1.25c    | 40.7d    | 0.451a         | 14.8a    | 0.072bcde         |
|           | Shiluan02-1       | CK        | 0.210a             | 11.9a    | 0.042f       | 2.4bc    | 0.539d   | 30.2d    | 0.77e    | 42.8bcd  | 0.228c         | 12.8ab   | 0.029de           |
|           |                   | DF2       | 0.191abc           | 8.0b     | 0.046ef      | 1.9de    | 0.733c   | 30.4cd   | 1.19c    | 49.3a    | 0.251c         | 10.4ab   | 0.062bcde         |
|           |                   | DF3       | 0.204ab            | 8.1b     | 0.050def     | 2.0cde   | 0.765c   | 30.5cd   | 1.21c    | 48.1a    | 0.285bc        | 11.3ab   | 0.039cde          |
|           |                   | DF4       | 0.227a             | 8.7b     | 0.055cde     | 2.1cde   | 0.783c   | 30.0d    | 1.22c    | 46.7ab   | 0.329abc       | 12.6ab   | 0.014e            |
|           | Variety           | *         | *                  | **       | **           | **       | **       | **       | **       | **       | **             | ns       |                   |
|           | Treatment         | **        | **                 | **       | **           | **       | **       | ns       | **       | *        | **             | ns       |                   |
|           | Variety*Treatment | ns        | ns                 | ns       | *            | ns       | **       | ns       | **       | ns       | ns             | ns       |                   |
| 2021-2022 | Jimai22           | CK        | 0.183a             | 6.7b     | 0.052cde     | 1.9bc    | 0.761b   | 27.7a    | 1.41de   | 51.6a    | 0.341abc       | 12.1a    | 0.033cd           |
|           |                   | DF2       | 0.139d             | 4.6f     | 0.047de      | 1.6c     | 0.762b   | 25.3abc  | 1.60bc   | 52.8a    | 0.459ab        | 15.2a    | 0.071ab           |
|           |                   | DF3       | 0.149cd            | 4.8ef    | 0.056bcde    | 1.8bc    | 0.807ab  | 25.8ab   | 1.66ab   | 52.9a    | 0.462ab        | 14.8a    | 0.040bcd          |
|           |                   | DF4       | 0.165b             | 4.9ef    | 0.066abcd    | 1.9bc    | 0.891a   | 26.2ab   | 1.80a    | 53.1a    | 0.473ab        | 13.9a    | 0.024d            |

|           |                        |     |         |       |            |        |          |        |         |       |          |       |          |
|-----------|------------------------|-----|---------|-------|------------|--------|----------|--------|---------|-------|----------|-------|----------|
| 2020-2022 | Jimai20                | CK  | 0.165b  | 6.3b  | 0.072ab    | 2.8a   | 0.599de  | 22.9c  | 1.42de  | 54.4a | 0.354abc | 13.6a | 0.039bcd |
|           |                        | DF2 | 0.137d  | 5.0ef | 0.060abcde | 2.2abc | 0.644cde | 23.6bc | 1.54bcd | 56.3a | 0.352abc | 12.9a | 0.078a   |
|           |                        | DF3 | 0.155bc | 5.2de | 0.071abc   | 2.4ab  | 0.726bc  | 24.3bc | 1.64b   | 54.8a | 0.400abc | 13.3a | 0.038cd  |
|           |                        | DF4 | 0.165b  | 5.2de | 0.077a     | 2.4ab  | 0.764b   | 24.0bc | 1.68ab  | 52.7a | 0.501a   | 15.7a | 0.038cd  |
|           | Shiluan02-1            | CK  | 0.146cd | 7.6a  | 0.043e     | 2.2abc | 0.502f   | 26.2ab | 0.99f   | 51.5a | 0.238c   | 12.5a | 0.045bcd |
|           |                        | DF2 | 0.123e  | 5.2de | 0.041e     | 1.8bc  | 0.554ef  | 23.7bc | 1.35e   | 57.9a | 0.270bc  | 11.5a | 0.065abc |
|           |                        | DF3 | 0.145cd | 5.7c  | 0.051de    | 2.0bc  | 0.605de  | 23.9bc | 1.40de  | 55.4a | 0.327abc | 12.9a | 0.047bcd |
|           |                        | DF4 | 0.154bc | 5.7cd | 0.056bcde  | 2.1bc  | 0.670cd  | 24.7bc | 1.47cde | 54.1a | 0.365abc | 13.4a | 0.043bcd |
|           | Variety                |     | **      | **    | **         | **     | **       | **     | **      | ns    | *        | ns    | ns       |
|           | Treatment              |     | **      | **    | *          | ns     | **       | ns     | **      | ns    | ns       | ns    | **       |
|           | Variety*Treatment      |     | *       | *     | ns         | ns     | ns       | ns     | ns      | ns    | ns       | ns    | ns       |
|           | Year*Variety           |     | **      | **    | ns         | ns     | ns       | **     | **      | **    | ns       | ns    | **       |
|           | Year*Treatment         |     | ns      | *     | ns         | ns     | *        | ns     | ns      | ns    | ns       | ns    | ns       |
|           | Variety*Treatment      |     | ns      | ns    | ns         | ns     | ns       | ns     | **      | ns    | ns       | ns    | ns       |
|           | Year*Variety*Treatment |     | ns      | ns    | ns         | **     | ns       | ns     | ns      | ns    | ns       | ns    | ns       |

Note: DMDA means the dry matter distribution amount (the weight of the organs of a single plant of wheat); DMDP means the dry matter distribution proportion (the proportion of the organ weight to the weight of a single plant of wheat).

**Table S2** Nitrogen distribution amount and proportion in wheat organs

| Year | Variety | Treatment | Upper three leaves |         | Other leaves |         | Stem     |         | Grain    |         | glume + rachis |         | remaining |
|------|---------|-----------|--------------------|---------|--------------|---------|----------|---------|----------|---------|----------------|---------|-----------|
|      |         |           | NDA (μg)           | NDP (%) | NDA (μg)     | NDP (%) | NDA (μg) | NDP (%) | NDA (μg) | NDP (%) | NDA (μg)       | NDP (%) | tillers   |

|                   |             |     |       |        |         |         |         |       |          |         |          |        | NDA (μg) |
|-------------------|-------------|-----|-------|--------|---------|---------|---------|-------|----------|---------|----------|--------|----------|
| 2020-2021         | Jimai22     | CK  | 4.35b | 11.3b  | 0.96b   | 2.5b    | 3.06a   | 7.8ab | 28.8ef   | 74.0c   | 1.74cdef | 4.5bc  | 1.44ab   |
|                   |             | DF2 | 3.29b | 7.7cd  | 0.84bc  | 2.0bcde | 3.31a   | 7.8ab | 32.3de   | 75.5bc  | 2.95a    | 7.0a   | 1.01bcd  |
|                   |             | DF3 | 3.42b | 6.7cd  | 1.01ab  | 2.0bcde | 3.85a   | 7.6ab | 39.8ab   | 78.5abc | 2.66ab   | 5.2abc | 1.16abcd |
|                   |             | DF4 | 3.49b | 6.5cde | 1.07ab  | 2.0bcde | 3.98a   | 7.4ab | 43.2a    | 79.7ab  | 2.48abc  | 4.6bc  | 0.78bcde |
|                   | Jimai20     | CK  | 3.50b | 5.1de  | 1.23a   | 1.7cde  | 4.30a   | 10.3a | 25.7fg   | 78.9ab  | 1.12f    | 3.1c   | 1.32abc  |
|                   |             | DF2 | 1.34c | 3.4e   | 0.65c   | 1.7cde  | 4.12a   | 10.4a | 31.2de   | 79.2ab  | 2.12bcde | 5.4ab  | 1.76a    |
|                   |             | DF3 | 1.38c | 3.4e   | 0.62c   | 1.5de   | 3.86a   | 9.5ab | 32.3de   | 79.7ab  | 2.38abcd | 5.9ab  | 0.95bcd  |
|                   |             | DF4 | 1.40c | 3.4e   | 0.62c   | 1.5e    | 3.70a   | 8.9ab | 33.4cd   | 80.4a   | 2.40abcd | 5.8ab  | 0.69cde  |
|                   | Shiluan02-1 | CK  | 5.66a | 17.3a  | 0.98b   | 3.0a    | 3.12a   | 9.6ab | 21.8g    | 65.8d   | 1.43ef   | 4.4bc  | 0.47de   |
|                   |             | DF2 | 4.08b | 9.3bc  | 0.85bc  | 1.9bcde | 3.53a   | 8.0ab | 34.1cd   | 77.1abc | 1.62def  | 3.7bc  | 0.91bcde |
|                   |             | DF3 | 4.19b | 9.3bc  | 0.92b   | 2.0bcd  | 3.27a   | 7.3ab | 34.9cd   | 77.5abc | 1.80cdef | 4.0bc  | 0.56de   |
|                   |             | DF4 | 4.48b | 9.4bc  | 1.00ab  | 2.1bc   | 3.23a   | 6.8b  | 36.8bc   | 77.4abc | 2.02bcde | 4.3bc  | 0.20e    |
| Variety           |             | **  | **    | **     | **      | **      | ns      | *     | **       | **      | **       | *      |          |
| Treatment         |             | **  | **    | **     | **      | **      | ns      | ns    | **       | **      | **       | ns     |          |
| Variety*Treatment |             | ns  | ns    | *      | **      | ns      | ns      | ns    | **       | **      | ns       | ns     |          |
| 2021-2022         | Jimai22     | CK  | 1.64a | 4.4b   | 0.43bc  | 1.2bc   | 2.30abc | 6.2b  | 31.5e    | 84.8ab  | 1.28ab   | 3.4a   | 0.37cde  |
|                   |             | DF2 | 1.04c | 2.5d   | 0.44bc  | 1.1bc   | 2.11abc | 5.2bc | 35.8cd   | 86.9ab  | 1.77ab   | 4.3a   | 0.83a    |
|                   |             | DF3 | 1.05c | 2.5d   | 0.47bc  | 1.1bc   | 1.96c   | 4.6c  | 37.3abcd | 87.6ab  | 1.76ab   | 4.2a   | 0.44cde  |
|                   |             | DF4 | 1.11c | 2.4d   | 0.48abc | 1.0bc   | 2.14abc | 4.6c  | 41.2a    | 88.2a   | 1.80ab   | 3.9a   | 0.20de   |
|                   | Jimai20     | CK  | 1.29b | 3.5c   | 0.65a   | 1.8a    | 1.90c   | 5.2bc | 31.4e    | 85.3ab  | 1.55ab   | 4.2a   | 0.18e    |
|                   |             | DF2 | 1.05c | 2.6d   | 0.55abc | 1.4b    | 2.02bc  | 5.0bc | 34.7cde  | 85.7ab  | 2.18a    | 5.4a   | 0.62abc  |
|                   |             | DF3 | 0.98c | 2.2d   | 0.56abc | 1.3bc   | 2.04bc  | 4.7c  | 38.3abcd | 87.5ab  | 1.84ab   | 4.3a   | 0.27de   |
|                   |             | DF4 | 0.96c | 2.1d   | 0.57ab  | 1.2bc   | 2.13abc | 4.6c  | 40.2ab   | 87.5ab  | 2.10a    | 4.6a   | 0.28de   |

|                   |                        |       |      |         |       |         |       |         |        |        |      |         |
|-------------------|------------------------|-------|------|---------|-------|---------|-------|---------|--------|--------|------|---------|
| Shiluan02-1       | CK                     | 1.64a | 5.4a | 0.57abc | 1.9a  | 2.44ab  | 8.0a  | 24.9f   | 81.4c  | 1.03b  | 3.4a | 0.49bcd |
|                   | DF2                    | 1.64a | 4.1b | 0.58ab  | 1.4b  | 2.50ab  | 6.3b  | 34.1de  | 84.6b  | 1.44ab | 3.6a | 0.74ab  |
|                   | DF3                    | 1.04c | 2.5d | 0.44bc  | 1.1bc | 2.32abc | 5.6bc | 36.4bcd | 87.2ab | 1.53ab | 3.7a | 0.33cde |
|                   | DF4                    | 0.93c | 2.1d | 0.40c   | 0.9c  | 2.54a   | 5.8bc | 38.8abc | 87.8ab | 1.52ab | 3.4a | 0.29de  |
| Variety           |                        | **    | **   | **      | **    | **      | **    | **      | ns     | *      | ns   | ns      |
| Treatment         |                        | **    | **   | ns      | **    | ns      | **    | **      | **     | ns     | ns   | **      |
| Variety*Treatment |                        | **    | **   | ns      | *     | ns      | ns    | ns      | ns     | ns     | ns   | ns      |
| 2020-2022         | Year*Variety           | **    | **   | **      | **    | **      | **    | **      | **     | *      | ns   | **      |
|                   | Year*Treatment         | **    | **   | *       | ns    | ns      | ns    | ns      | ns     | ns     | ns   | ns      |
|                   | Variety*Treatment      | ns    | **   | **      | *     | ns      | ns    | **      | **     | ns     | ns   | ns      |
|                   | Year*Variety*Treatment | ns    | ns   | **      | ns    | ns      | ns    | ns      | ns     | ns     | ns   | ns      |

Note: NDA means the nitrogen distribution amount (the nitrogen weight of the organs of a single plant of wheat); NDP means the dry nitrogen distribution proportion (the nitrogen proportion of the organ nitrogen weight to a single plant nitrogen weight of wheat).
